# Supplementary material
Source: publisher figshare collection journal article supplement (https://tandf.figshare.com/articles/dataset/_/3706053)
Supplement: Supplementary file 1 [file 1]

**Table S1.** Mirs comprising the *Mirc1/Mir7-92* cluster and *Mir101* and their predicted targets.

|               | <b>Predicted autophagy targets</b>            |
|---------------|-----------------------------------------------|
| <i>Mir17a</i> | <i>Atg5, Becn1, Atg7, Atg12, Atg16l1</i>      |
| <i>Mir18a</i> |                                               |
| <i>Mir19a</i> | <i>Atg4, Atg5, Becn1, Lc3, Atg12, Atg16l1</i> |
| <i>Mir19b</i> | <i>Atg4, Atg5, Becn1, Lc3, Atg12, Atg16l1</i> |
| <i>Mir20</i>  | <i>Atg5, Becn1, Atg7, Atg12, Atg16l1</i>      |
| <i>Mir92a</i> | <i>Lc3</i>                                    |
|               |                                               |
| <i>Mir101</i> | <i>Atg4d, Rab5a, Stmn1</i>                    |
