# Supplementary material
Source: publisher figshare collection journal article supplement (https://tandf.figshare.com/articles/dataset/_/3706053)
Supplement: Supplementary file 3 [file 1]

**Table S2.** Site-directed mutagenesis primer sequences.

| Primer Name                                    | 5'-3' Sequence                                           |
|------------------------------------------------|----------------------------------------------------------|
| Atg7 3'UTR Mutant g877a_a879g_t882c sense      | gccacacagcctcggtttaagaacgctctattattgttcttaaggctact       |
| Atg7 3'UTR Mutant g877a_a879g_t882c antisense  | agtagccttaagaacaataatagagcgttcttaaaccgaggctgtgtggc       |
| Atg16 3'UTR Mutant g104a_c107t_t109g sense     | gccatgtggtgccgtagctttcttgaaaattgtgacttaagggtctctaag      |
| Atg16 3'UTR Mutant g104a_c107t_t109g antisense | cattagagaccttaagtcacaattttcaagaaagctacggcaccacatggc      |
| Atg16 3'UTR Mutant c805g_t807c_t810a sense     | ctgggctgggaaaggactcactgtcctgctcgcc                       |
| Atg16 3'UTR Mutant c805g_t807c_t810a antisense | ggcgagcaggacagtgagtccttcccagcccag                        |
| Atg16 3'UTR Mutant g870a_a872t_t874g sense     | cacgtttgtctgtcacacttactttactcgttatTTTTgcttccacactgttct   |
| Atg16 3'UTR Mutant g870a_a872t_t874g antisense | agaacagtgtggaagcaaaaaataacgagtaaagtaagtgtagacagacaaacgtg |
